# Supplementary material for: CXCR7 Reactivates ERK Signaling to Promote Resistance to EGFR Kinase Inhibitors in NSCLC
Source: Oxford University Press journal article supplement (doi:10.1158/0008-5472.can-19-0024), 2019-07-04
Supplement: 00085472can190024-sup-214702_2_supp_5596713_ptd9fj.xlsx [file 00085472can190024-sup-214702_2_supp_5596713_ptd9fj.xlsx]

## Sheet: Sheet1
TGFB1	CDH1KD	SNAIL		68 common elements in "TGFB1", "CDH1KD" and "SNAIL":	53 common elements in "TGFB1" and "CDH1KD":	40 common elements in "TGFB1" and "SNAIL":	113 common elements in "CDH1KD" and "SNAIL":	82 elements included exclusively in "TGFB1":	217 elements included exclusively in "CDH1KD":	201 elements included exclusively in "SNAIL":
KRT8	GSPT2	ID2		EHF	TJP3	KRT8	LAMA3	ENTPD6	GSPT2	ID2
ENTPD6	PANK1	LOC644334		PKIB	HCP5	HAS3	APOL1	ARL4A	PANK1	LOC644334
ARL4A	SOD2	MFSD6		TMEM30B	TP63	REEP6	ENO2	SPRR3	SOD2	MFSD6
HAS3	SPDEF	EPHA1		GRB7	TP73L	PLCH1	RIPK4	PPARG	SPDEF	LRRC1
TJP3	GBP2	MERTK		CDCA7L	GRTP1	DPP4	LAMB3	CRIP2	GBP2	FAM162A
SPRR3	LAMA3	LRRC1		HS3ST1	LOC651524	PDK4	GCHFR	CHEK2	C4ORF19	LOC651116
REEP6	C4ORF19	FAM162A		PPL	LOC100129186	FOXA2	EPHA1	TMEM173	CNTN1	EXOC6
PPARG	CNTN1	LOC651116		MYB	SAA1	FLJ20273	SPINT1	PYGB	SCARNA14	LOC647169
CRIP2	SCARNA14	FGA		ERBB3	WDR13	SORL1	CBLC	WDR34	SDC1	CXADR
CHEK2	SDC1	CBLC		PROM2	IFITM3	AGPAT9	HS.28456	SFTPA1	CYB561	KIAA1804
TMEM173	CYB561	EXOC6		ADAP1	AP1M2	TNRC9	PPP1R14C	GULP1	VEGFA	KCNK1
EHF	VEGFA	LOC647169		SFTA3	CCL20	RAPGEF5	FER1L4	TMEM163	PKP2	BATF3
PYGB	PKP2	CXADR		C2ORF15	SERPINA3	EREG	MYO6	LOC642103	ZSWIM5	FLJ40504
WDR34	ZSWIM5	KIAA1804		MUC16	IFITM2	HNF4G	NFE2	TRIM55	DTX2	MOCOS
HCP5	DTX2	KCNK1		SEMA4B	BCL3	LYPD1	MGLL	C20ORF118	PSMB8	LOC646243
TP63	PSMB8	SPINT1		HS.509165	BDNF	DDC	SCARNA13	STEAP1	EFNA1	DSP
SFTPA1	EFNA1	BATF3		STX19	TNFRSF6B	LOC149501	KLK6	NME5	STK31	GRAMD3
GULP1	STK31	FLJ40504		DEFB4	STEAP2	MAP3K5	SCARNA8	RGS17	LOC646750	TNC
TMEM163	LOC646750	ABCA7		LOC100134073	LOC653061	LOC643431	OLFM4	APOBEC3B	PSD4	C16ORF74
PLCH1	PSD4	MOCOS		SCEL	PTPN20	TOX3	ZNF165	ZNF395	HIST2H2AA4	BTC
LOC642103	HIST2H2AA4	LOC646243		IGFBP3	HGD	SLC16A5	IRF6	PSG3	PNKD	ANKRD57
TP73L	PNKD	DSP		TMEM27	DLG3	CENTA1	FLJ12684	PPAP2C	STAT3	SLC9A3R1
PKIB	STAT3	GRAMD3		TNFSF10	ILDR1	EMP1	FAM83A	LOC644624	C1S	SHROOM3
TRIM55	C1S	TNC		CYP1B1	C11ORF70	LGALS7B	ABCA7	FA2H	IFI27L1	LOC441019
C20ORF118	IFI27L1	TNFSF10		DEFB1	EYA1	LOC647954	GRHL2	LOC388743	D2HGDH	C19ORF51
STEAP1	D2HGDH	C16ORF74		ANKRD22	HS.374023	GCNT3	LSR	LRP5	MYD88	RTKN
GRTP1	MYD88	BTC		LCN2	SLPI	HPGD	LRCH2	AQP3	SPAG4	SPG3A
NME5	SPAG4	KRT8		SNTB1	SULT1A4	AKR1B10	FGA	FAM110A	SLC43A3	C9ORF140
RGS17	HGD	LOC100132377		SOX21	HS.291319	BCMO1	ITGB4	IGFBP2	SNORA28	PFKFB3
LOC651524	APOL1	NFE2		ALOX5	IFITM1	IMPA2	RAMP1	TBC1D8	BMPR2	ZP3
DPP4	SLC43A3	ANKRD57		TRIM31	C4ORF31	ELF3	LY6D	HS.567759	PRRG4	DHCR7
LOC100129186	SNORA28	ANKRD22		CFH	ERVK6	MERTK	CYP2J2	DAPK1	CD47	RASSF7
APOBEC3B	BMPR2	SLC9A3R1		RAB38	CFB	NR5A2	CGN	PAEP	IL27RA	KIAA1522
ZNF395	PRRG4	SHROOM3		TMEM125	TMC5	ID1	GPR160	METTL7B	PON3	ARHGEF16
TMEM30B	CD47	LOC441019		FGG	SLC27A2	IGFBP1	PRKCH	PRR15L	OPN3	MALL
PSG3	IL27RA	C19ORF51		IL20RB	RNF183	HS.25318	LRG1	MTUS1	GCNT1	CYP2S1
PDK4	ADAP1	RTKN		GPX2	DNAH2	ABCC2	LOC647859	IL1F7	PLSCR4	NGEF
PPAP2C	PON3	TRIM31		ABCA12	CEACAM1	CFI	RAB15	STMN3	LOC285141	SNORA79
SAA1	OPN3	SPG3A		STAT4	PELI2	RERG	CHST4	CORO2A	ADM	GALNTL4
LOC644624	GCNT1	C9ORF140		SERPINB4	C13ORF15	ABCC3	VAMP8	TMEM64	OR4K15	UBASH3B
FA2H	BCL3	PFKFB3		CYP26A1	GDF15		TSPAN13	LACTB2	PRRG2	MB
WDR13	PLSCR4	MAP3K5		COL17A1	C4BPA		CXCL16	MX2	PTGS1	TM7SF2
GRB7	ENO2	PDK4		SERPINB3	SYK		CXORF57	SLC22A18	SLC16A10	C7ORF47
LOC388743	LOC285141	SCARNA8		SGPP2	ACOX2		HOOK1	SPSB2	HLA-DRB1	BCL11A
LRP5	ADM	ZP3		ACMSD	S100A9		LOC285359	ARL14	ST5	FAM80A
FOXA2	OR4K15	DHCR7		FGB	C10ORF81		PRSS8	ST3GAL5	GBP3	EPS8
CDCA7L	EYA1	RASSF7		FGFBP1	CHI3L2		CHMP4C	CEACAM5	SPDYE1	SH3BGRL2
FLJ20273	PRRG2	KIAA1522		HHLA2	MUC5AC		CLDN7	ST6GALNAC1	PRSS22	AHNAK2
AQP3	PTGS1	ARHGEF16		ERP27	APOBEC1		WFDC3	LY6E	TNFAIP2	AKR1B15
HS3ST1	SLC16A10	MALL		SLC22A18AS	LOC728454		F11R	OAS2	PCTK3	LYN
FAM110A	HLA-DRB1	SORL1		SPINK1	S100P		MOSC1	FAM3C	HSH2D	TMEM144
SORL1	ST5	CYP2S1		GPR110	LOC729252		CRB3	GSTA4	PRICKLE2	SLC29A2
PPL	GBP3	SOX21		MMP7	TRPC6		GALNT12	LOC644151	LOC554223	CHAC2
IGFBP2	MUC16	ITGA2		BCL2L15			SLAIN1	VSIG1	TBC1D8B	INSIG1
TBC1D8	SPDYE1	NGEF		AGR2			LOC100132240	KITLG	FAM108C1	C10ORF47
IFITM3	PRSS22	SNORA79		PCDH7			SLC39A8	SEMA3A	FAM89A	DHRS3
AGPAT9	RIPK4	GALNTL4		RAB25			MARVELD3	DEPDC6	DRAM1	LMTK3
HS.567759	TNFAIP2	HS.181245		SOX2			ITGA2	KRT16	URG4	PARP12
AP1M2	TJP3	UBASH3B		MUC1			HS.181245	SPRY1	HS.437111	LGSN
CCL20	PCTK3	PPP1R14C		TCN1			GCA	ACSL5	KDM5B	GOLSYN
TNRC9	HSH2D	MB		SCNN1A			C19ORF46	LMO7	TSPAN1	F12
RAPGEF5	LAMB3	TM7SF2		MGC102966			ENPP5	CNKSR3	GJB3	HTR3A
DAPK1	PRICKLE2	C7ORF47		PRODH			C1ORF106	FGF9	LOC648399	SLC41A2
EREG	LOC554223	BCL11A		RARRES3			TUBA4A	HOPX	HIST2H2AA3	CD2AP
PAEP	TBC1D8B	FAM80A		LOC400578			TACSTD1	HABP2	KRT6A	ABLIM1
METTL7B	C13ORF15	APOL1		CEACAM6			HS.559604	C9ORF152	KANK1	KIF21A
SERPINA3	FAM108C1	EPS8		TSPAN8			DENND2D	LOC730525	ODF2L	TNFRSF21
PRR15L	FAM89A	HS3ST1		NAPSA			TGFA	FLRT3	VASN	CLDN3
IFITM2	DRAM1	SH3BGRL2					JUP	TM4SF4	NFIA	LOC100134794
MTUS1	URG4	PLCH1					RPS6KA2	C9ORF84	AZGP1	BAIAP2L1
BCL3	HS.437111	AHNAK2					BSPRY	MYLIP	EDG4	LOC389160
IL1F7	KDM5B	PPL					SQRDL	KCNK2	HS.296031	HS.575038
BDNF	TSPAN1	AKR1B15					RLN2	LIMCH1	BIRC3	STS-1
STMN3	PELI2	LYN					SH3YL1	MUC20	SERPINB5	NUP62CL
MYB	GJB3	TCN1					CCDC148	C5ORF39	FLJ14712	KRT7
HNF4G	LOC648399	SLCO2A1					NKX2-1	FGF13	FAM176A	SOX4
TNFRSF6B	GCHFR	TMEM144					PKIA	HS.370359	FAM83H	SYT13
CORO2A	AP1M2	SLC29A2					LOC388564	FMO5	ST6GAL1	LGALS3
TMEM64	HIST2H2AA3	RIPK4					MAPK13	NFIB	MVP	EVPL
LYPD1	KRT6A	CHAC2					PEG10	CYB5A	NOTCH3	ARPC1B
LACTB2	KANK1	INSIG1					GPR56	RGS7	TMEM45B	EFHB
MX2	ODF2L	C10ORF47					KRTCAP3	KRT20	PAK1	LRBA
SLC22A18	VASN	DHRS3					EPCAM		EVI1	ACSM3
DDC	NFIA	LMTK3					TC2N		SLC2A3	PTGS2
SPSB2	AZGP1	TMEM125					MYO5C		MYO1D	CRABP2
LOC149501	EPHA1	ID1					SGCE		PMCH	C19ORF33
STEAP2	EDG4	PARP12					RAB17		DNM3	LOC653110
ARL14	HS.296031	LYPD1					HLA-DMB		CSRP2	HRASLS3
LOC653061	SPINT1	LGSN					MOBKL2B		ATP11B	SPTLC3
PTPN20	BIRC3	WFDC3					LOC100132377		CYP2R1	IGFBP6
ST3GAL5	SERPINB5	GOLSYN					ST14		IL4R	SPAG1
CEACAM5	FLJ14712	IRF6					CNTNAP2		HLA-DMA	LOC729779
ERBB3	FAM176A	F12					KCNS3		LOC729985	LOC389641
PROM2	FAM83H	HTR3A					CST6		HS.125056	PLEKHA6
ST6GALNAC1	CBLC	HHLA2					SERPINA1		S100A7	CCNYL1
MAP3K5	ST6GAL1	SLC16A5					C1ORF116		GAD1	ABHD7
HGD	HS.28456	SLC41A2					OVOL2		ARSD	TMEM62
ADAP1	MVP	ITGB4					CDH1		INADL	TFPI2
LY6E	NOTCH3	ABCA12					DMKN		FRAS1	HS.91389
OAS2	PPP1R14C	CD2AP					CDS1		TNIP3	ASNS
DLG3	TMEM45B	ABLIM1					SLCO2A1		TRIB2	CDH6
FAM3C	PAK1	KIF21A					LAMC2		ZC3H12A	C6ORF141
LOC643431	EVI1	TNFRSF21					MAP7		PDE5A	BRI3BP
GSTA4	SLC2A3	VAMP8					FOXA1		RDM1	LOC653888
LOC644151	MYO1D	CLDN3					C15ORF48		C6ORF105	C20ORF75
TOX3	FER1L4	DEFB4					LAD1		DMBX1	RBM35A
VSIG1	MYO6	LOC100134794					PDZK1IP1		PNCK	ENPP4
ILDR1	PMCH	BAIAP2L1					CDH3		HS.176498	SMAGP
KITLG	DNM3	LOC389160					MPZL2		OAT	C8ORF55
SEMA3A	NFE2	HS.575038					CXCL5		UBD	FLJ22184
C11ORF70	TNFRSF6B	STS-1					SFTA2		NCOA7	SMPDL3B
SFTA3	CSRP2	NUP62CL					MAL2		C6ORF211	NTN4
EYA1	HS3ST1	KRT7					LCP1		GALNT5	GUCY1A3
C2ORF15	ATP11B	LOC285359							HIST1H2BH	WWTR1
HS.374023	CYP2R1	SOX4							BMF	ELMO3
SLC16A5	IL4R	SYT13							C1ORF53	MAPKAPK3
SLPI	HLA-DMA	LGALS3							SESTD1	FHOD3
MUC16	LOC729985	HS.25318							GNA15	JAG2
DEPDC6	HS.125056	EVPL							SLC45A3	CFD
KRT16	MGLL	ARPC1B							HS.434957	WWC1
SULT1A4	SCARNA13	EFHB							RLN1	KIAA0895
CENTA1	S100A7	LSR							UCA1	FOLR1
SEMA4B	GAD1	CDCA7L							LOC647947	CCDC109B
HS.291319	PPL	LRBA							BAZ2B	MGST1
IFITM1	ARSD	ENPP5							DUSP23	C9ORF58
EMP1	ACOX2	ACSM3							LOC647784	TMEM156
C4ORF31	IFITM1	LRG1							RNF212	KRT18
HS.509165	KLK6	PTGS2							FUT2	COBLL1
STX19	INADL	CHMP4C							LOC100134134	LOC728014
LGALS7B	C4BPA	CRABP2							LOC646836	LOC340598
ERVK6	LOC729252	FAM83A							GAB2	PLLP
SPRY1	SNTB1	HS.28456							ITGB2	FBXO32
LOC647954	FRAS1	LRCH2							DDR1	ELFN2
GCNT3	TNIP3	C19ORF33							SBK1	F2RL1
ACSL5	TRIB2	CHST4							SOCS2	CLDN1
CFB	C4ORF31	RLN2							CYTSB	AIF1L
TMC5	ZC3H12A	LOC653110							IFI44	LIPG
HPGD	PDE5A	PRKCH							PGBD5	LRRC26
SLC27A2	SCARNA8	HRASLS3							TACSTD2	HAVCR1
LMO7	RDM1	SPTLC3							KBTBD11	SFN
CNKSR3	OLFM4	ENO2							PTGES	AKR1C4
FGF9	GDF15	SLC39A8							APOL2	CDCP1
AKR1B10	IGFBP3	IGFBP6							LRRC6	LOC399965
RNF183	ZNF165	SPAG1							ISG20	SLC39A11
DNAH2	C6ORF105	ADAP1							ERO1L	NFE2L3
BCMO1	DMBX1	LOC729779							LRRCC1	KRT18P17
IMPA2	IRF6	SEMA4B							TRIM15	KRT18P28
HOPX	FLJ12684	DEFB1							ACOT11	LAMA5
ELF3	PNCK	LOC389641							SAA4	CASP6
CEACAM1	HS.176498	PLEKHA6							OAS3	WDR66
HABP2	OAT	CCNYL1							LOC731895	RFFL
C9ORF152	C2ORF15	RAB15							GALC	CD24
PELI2	UBD	DDC							TMEM170B	KIAA1671
LOC730525	NCOA7	ABHD7							IL1B	FERMT1
FLRT3	C11ORF70	TMEM62							ARHGEF5	FGD6
DEFB4	C6ORF211	TFPI2							GPR98	MARVELD2
LOC100134073	GALNT5	SFTA3							C6ORF58	EFNB2
SCEL	HIST1H2BH	CXORF57							PFKFB4	NFKBIZ
IGFBP3	DLG3	MYB							SAMD9L	BAIAP2L2
C13ORF15	BMF	SLAIN1							WDR72	BTBD11
TM4SF4	FAM83A	HS.91389							FLJ10916	LOC441453
MERTK	ABCA7	MOBKL2B							MX1	TMEM56
C9ORF84	C1ORF53	ASNS							C1ORF115	DSC2
GDF15	SESTD1	CDH6							F3	TRNP1
TMEM27	GNA15	C6ORF141							IER3	SNAI2
TNFSF10	SLC45A3	BRI3BP							STK32A	UGT8
CYP1B1	GRHL2	LOC653888							LEMD1	KRT18P13
DEFB1	HS.434957	C20ORF75							TSTD1	ITPR3
NR5A2	BDNF	RBM35A							LOC401152	BIK
ID1	SULT1A4	HS.509165							IFIH1	TNFAIP8
MYLIP	RLN1	LY6D							PGM2L1	LOC389816
IGFBP1	UCA1	STX19							BACE2	FAM84B
ANKRD22	LSR	SCARNA13							LOC644782	LOC653108
LCN2	LOC100129186	GCA							RICH2	SLC44A3
SNTB1	LOC647947	BSPRY							IL1A	TCF2
SOX21	LRCH2	LAMB3							TXNIP	GPR81
ALOX5	BAZ2B	ENPP4							STC1	HS.538259
KCNK2	DUSP23	SMAGP							FSTL1	RBM47
C4BPA	TP73L	CCDC148							SRPX2	AKR1C3
LIMCH1	LOC647784	C8ORF55							IFI44L	TPD52L1
SYK	FGA	FLJ22184							C1ORF218	TPD52
TRIM31	ITGB4	SMPDL3B							EPSTI1	MEST
CFH	GRTP1	CYP2J2							UBE2L6	TRIB1
RAB38	RNF212	NTN4							LOC728855	GRB14
MUC20	FUT2	GUCY1A3							KIAA0672	VAV3
C5ORF39	RAMP1	LOC100134073							DEFB103B	TM4SF18
FGF13	LOC100134134	MUC1							C1RL	HNF1B
ACOX2	LOC646836	WWTR1							PLAUR	LOC100101266
S100A9	GAB2	ELMO3							BST2	HKDC1
C10ORF81	LOC100134073	HLA-DMB							CXCL6	PRSS3
TMEM125	ITGB2	MAPKAPK3							GOLT1A	GJB2
FGG	LY6D	FHOD3							IL6	MBP
CHI3L2	CYP2J2	JAG2							RGL1	FAM113B
MUC5AC	SCEL	CFD							JPH1	COBL
IL20RB	CGN	WWC1							TMEM166	CD9
GPX2	FGFBP1	KIAA0895							GBP1	PLS1
APOBEC1	GPR160	FOLR1							LOC100129681	HS.125395
HS.370359	DDR1	SERPINB4							CXCL2	ALDH1A3
ABCA12	SBK1	CCDC109B							TFAP2A	SPINT2
HS.25318	SOCS2	LOC647954							DSE	SPP1
STAT4	SYK	MUC16							HLA-B	KRT19
SERPINB4	CYTSB	NKX2-1							HDHD1A
LOC728454	IFI44	ALOX5							IFI16
CYP26A1	PGBD5	MYO6							CDA
COL17A1	TACSTD2	MGST1							MST4
SERPINB3	KBTBD11	GALNT12							CXORF61
SGPP2	PTGES	C9ORF58							SLFN11
ACMSD	APOL2	TMEM156							IL8
ABCC2	LRRC6	GRHL2							HNMT
CFI	ISG20	GCHFR							IFI27
RERG	ERO1L	KRT18							KYNU
FGB	TMEM27	COBLL1							SEL1L3
FGFBP1	HS.291319	LOC728014							ARHGEF5L
FMO5	LRRCC1	HAS3							EPAS1
NFIB	PRKCH	LOC340598							CXCL1
CYB5A	LRG1	PLLP							S100A16
RGS7	ERVK6	FBXO32							BEX2
HHLA2	SLC27A2	GPR56
ERP27	TRIM15	ABCC2
ABCC3	ACOT11	ELFN2
SLC22A18AS	DNAH2	SH3YL1
KRT20	LOC647859	SQRDL
S100P	RAB15	F2RL1
SPINK1	SAA4	C19ORF46
GPR110	OAS3	CLDN1
MMP7	CHST4	AIF1L
LOC729252	LOC651524	F11R
BCL2L15	VAMP8	RAMP1
AGR2	LOC731895	LIPG
TRPC6	TSPAN13	LRRC26
PCDH7	GALC	REEP6
RAB25	CXCL16	HAVCR1
SOX2	TMEM170B	FLJ12684
MUC1	APOBEC1	SFN
TCN1	CXORF57	GPR160
SCNN1A	HOOK1	AKR1C4
MGC102966	IL1B	MAPK13
PRODH	S100P	CDCP1
RARRES3	ARHGEF5	LOC399965
LOC400578	LOC285359	SLC39A11
CEACAM6	PRSS8	EREG
TSPAN8	GPR98	NFE2L3
NAPSA	C6ORF58	KRT18P17
	PFKFB4	GPX2
	SAMD9L	KRT18P28
	CHMP4C	SLC22A18AS
	ILDR1	GCNT3
	WDR72	PCDH7
	CLDN7	SNTB1
	FLJ10916	LAMA5
	RNF183	CENTA1
	C10ORF81	CASP6
	CEACAM1	IGFBP3
	MX1	WDR66
	C1ORF115	DENND2D
	F3	RFFL
	IER3	CD24
	WFDC3	KIAA1671
	F11R	LOC149501
	SLC22A18AS	GPR110
	MOSC1	CXCL16
	CRB3	FERMT1
	TP63	FGD6
	SOX21	DPP4
	CDCA7L	MARVELD2
	TMC5	BCMO1
	GALNT12	ZNF165
	SLAIN1	PRSS8
	STK32A	RPS6KA2
	LOC100132240	TMEM27
	LEMD1	KRTCAP3
	TNFSF10	C2ORF15
	SLC39A8	LOC100132240
	TSTD1	LOC643431
	LOC401152	EFNB2
	MARVELD3	EMP1
	ITGA2	NFKBIZ
	IFIH1	BAIAP2L2
	PGM2L1	MOSC1
	LOC653061	BTBD11
	BACE2	RARRES3
	HS.181245	PKIA
	GCA	CRB3
	LOC644782	LOC441453
	PTPN20	SCEL
	C19ORF46	MARVELD3
	CYP26A1	HS.559604
	STEAP2	STAT4
	ENPP5	CYP1B1
	C1ORF106	TNRC9
	WDR13	TC2N
	TUBA4A	MGLL
	MYB	TMEM56
	STX19	DSC2
	TACSTD1	TRNP1
	RICH2	SNAI2
	IL1A	UGT8
	TXNIP	KRT18P13
	STC1	ITPR3
	FSTL1	BIK
	SRPX2	TNFAIP8
	IFI44L	CFH
	SEMA4B	SERPINB3
	C1ORF218	LOC389816
	HS.559604	RAPGEF5
	EPSTI1	FAM84B
	UBE2L6	RAB25
	DENND2D	ABCC3
	ANKRD22	LOC653108
	LOC728855	SLC44A3
	KIAA0672	HNF4G
	ABCA12	FER1L4
	DEFB103B	ACMSD
	C1RL	HOOK1
	TGFA	TCF2
	JUP	CYP26A1
	PLAUR	GRB7
	BST2	KCNS3
	RPS6KA2	GPR81
	CFH	LAMA3
	BSPRY	HS.538259
	COL17A1	RBM47
	SQRDL	AKR1C3
	CXCL6	C1ORF106
	RLN2	TPD52L1
	GOLT1A	LGALS7B
	IL6	TPD52
	RGL1	FOXA2
	CHI3L2	MEST
	SH3YL1	AGPAT9
	JPH1	ST14
	TSPAN8	TRIB1
	SFTA3	TMEM30B
	GPR110	CEACAM6
	TMEM166	GRB14
	TMEM125	VAV3
	GBP1	MYO5C
	CCDC148	PDZK1IP1
	NKX2-1	TM4SF18
	MUC5AC	PROM2
	LOC100129681	HNF1B
	PKIA	RAB17
	TRIM31	JUP
	CXCL2	PEG10
	HS.509165	EHF
	TFAP2A	LOC647859
	PKIB	IMPA2
	LOC388564	LOC100101266
	MAPK13	KLK6
	PEG10	IL20RB
	DSE	TSPAN13
	TCN1	SOX2
	GPR56	RERG
	SLPI	COL17A1
	HLA-B	TUBA4A
	HDHD1A	TOX3
	IFI16	HKDC1
	GPX2	FLJ20273
	BCL2L15	LOC400578
	CDA	CXCL5
	KRTCAP3	SGPP2
	MST4	PRSS3
	EPCAM	MGC102966
	CXORF61	GJB2
	TC2N	MBP
	RAB38	FGFBP1
	HHLA2	TGFA
	MYO5C	CNTNAP2
	GRB7	SGCE
	SGCE	ELF3
	CYP1B1	MMP7
	RAB17	SPINK1
	SLFN11	FAM113B
	EHF	AGR2
	HCP5	MAP7
	HLA-DMB	CDS1
	IL8	ERBB3
	HNMT	CGN
	MOBKL2B	AKR1B10
	IFI27	CLDN7
	DEFB1	COBL
	ACMSD	SCNN1A
	IL20RB	CST6
	IFITM2	CD9
	LOC100132377	LOC388564
	KYNU	PRODH
	ST14	NAPSA
	STAT4	TSPAN8
	SEL1L3	DMKN
	TRPC6	CFI
	IFITM3	PKIB
	ARHGEF5L	RAB38
	EPAS1	C1ORF116
	SAA1	FGG
	CNTNAP2	FOXA1
	SERPINA3	IGFBP1
	CXCL1	LAMC2
	ALOX5	NR5A2
	KCNS3	OLFM4
	CST6	OVOL2
	SERPINA1	MPZL2
	TMEM30B	SFTA2
	C1ORF116	SERPINA1
	S100A16	BCL2L15
	CCL20	PLS1
	SERPINB3	HS.125395
	OVOL2	ALDH1A3
	BEX2	HPGD
	SERPINB4	CDH3
	CDH1	LAD1
	DMKN	CDH1
	CDS1	SPINT2
	SLCO2A1	FGB
	SGPP2	EPCAM
	PROM2	C15ORF48
	ERBB3	LCN2
	CEACAM6	TACSTD1
	LAMC2	LCP1
	MAP7	SPP1
	HS.374023	MAL2
	SCNN1A	ERP27
	SPINK1	KRT19
	PCDH7
	FOXA1
	S100A9
	C15ORF48
	MMP7
	RAB25
	LAD1
	RARRES3
	FGG
	LOC400578
	CFB
	PDZK1IP1
	MGC102966
	SOX2
	CDH3
	AGR2
	MPZL2
	CXCL5
	MUC1
	FGB
	PRODH
	SFTA2
	ERP27
	NAPSA
	MAL2
	LCP1
	LOC728454
	DEFB4
	LCN2
